# Supplementary figures and images for: Longitudinal Changes of Body Composition Phenotypes and Their Association with Incident Type 2 Diabetes Mellitus during a 5-Year Follow-up in Koreans
Source: PubMed Central journal article supplement — Diabetes Metab J. 2019 Apr 19;43(5):627–39. doi: 10.4093/dmj.2018.0141 (PMC6834838; doi:10.4093/dmj.2018.0141), 2019-04-19

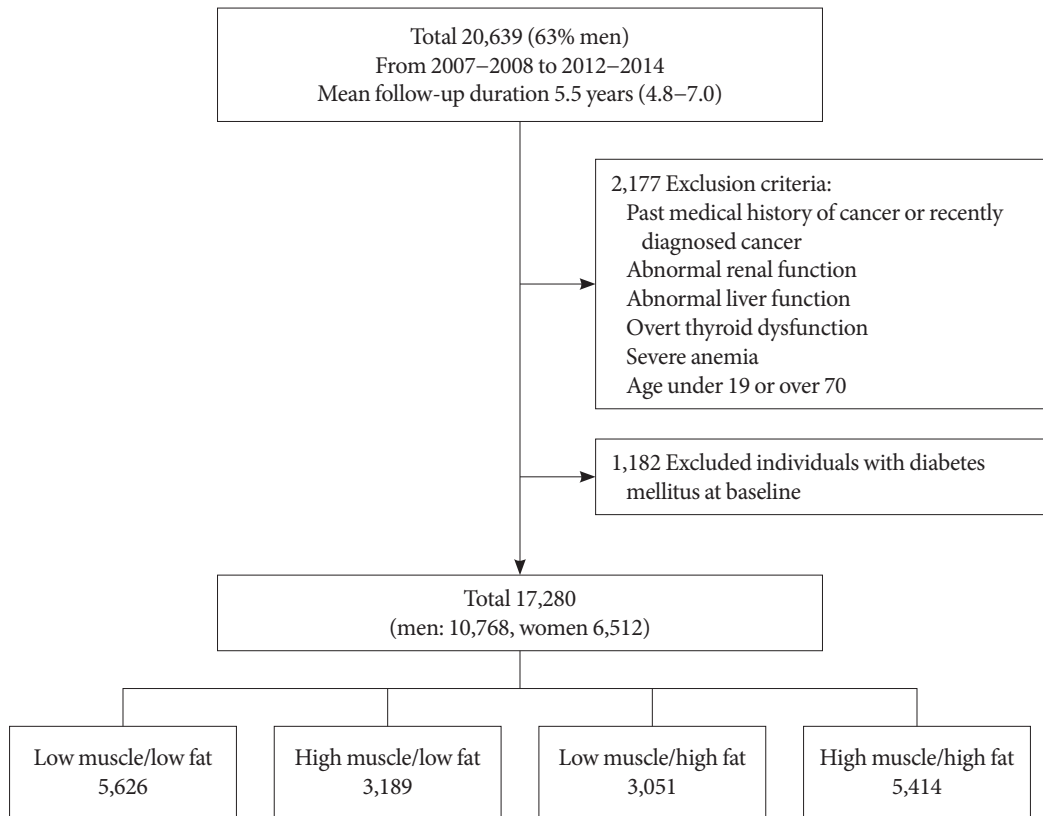

**Supplementary Fig. 1.** Flowchart showing the inclusion and exclusion of study participants.

Supplement: dmj-43-627-s001.pdf [file dmj-43-627-s001.pdf]
